# Supplementary material
Source: publisher figshare collection journal article supplement (https://frontiersin.figshare.com/ndownloader/files/14395568)
Supplement: Supplementary file 1 [file 14395568]

## Sheet: Feuil1
Locus pair	Chi2	df	P-Value
HD42 & HD43	4.461895	10	0.924114
HD42 & HD47	6.881716	10	0.736562
HD43 & HD47	4.636319	10	0.914112
HD42 & HD59	4.096964	10	0.942867
HD43 & HD59	3.542850	10	0.965623
HD47 & HD59	11.796118	10	0.298933
HD42 & HD65	3.986131	10	0.947971
HD43 & HD65	9.300529	10	0.503840
HD47 & HD65	7.371002	10	0.690017
HD59 & HD65	7.759557	10	0.652310
HD42 & HD70	11.129826	10	0.347493
HD43 & HD70	9.659192	10	0.470885
HD47 & HD70	7.762912	10	0.651983
HD59 & HD70	2.834320	10	0.985058
HD65 & HD70	14.909248	10	0.135406
HD42 & HD77	11.548632	10	0.316400
HD43 & HD77	16.247841	10	0.092754
HD47 & HD77	6.023222	10	0.813308
HD59 & HD77	11.498929	10	0.319989
HD65 & HD77	12.685775	10	0.241775
HD70 & HD77	16.642456	10	0.082659
HD42 & HD80	15.871789	10	0.103362
HD43 & HD80	5.480073	10	0.856893
HD47 & HD80	1.922787	10	0.996898
HD59 & HD80	11.327108	10	0.332608
HD65 & HD80	14.062951	10	0.170140
HD70 & HD80	8.422132	10	0.587676
HD77 & HD80	8.313050	10	0.598288
HD42 & HD81	12.012289	10	0.284235
HD43 & HD81	6.108631	10	0.806055
HD47 & HD81	6.860982	10	0.738501
HD59 & HD81	6.303790	10	0.789127
HD65 & HD81	14.287486	10	0.160278
HD70 & HD81	13.125923	10	0.216716
HD77 & HD81	19.666610	10	0.032568
HD80 & HD81	15.122751	10	0.127650
HD42 & HD90	8.181840	10	0.611080
HD43 & HD90	2.407119	10	0.992161
HD47 & HD90	2.991579	10	0.981622
HD59 & HD90	Infinity	10	Highly sign.
HD65 & HD90	7.176975	10	0.708638
HD70 & HD90	3.300051	10	0.973455
HD77 & HD90	12.861221	10	0.231535
HD80 & HD90	8.033626	10	0.625552
HD81 & HD90	12.413225	10	0.258352
HD42 & Hdiv6	6.885363	6	0.331579
HD43 & Hdiv6	3.623301	6	0.727499
HD47 & Hdiv6	5.019029	6	0.541375
HD59 & Hdiv6	1.561742	6	0.955288
HD65 & Hdiv6	2.071833	6	0.912975
HD70 & Hdiv6	13.386380	6	0.037294
HD77 & Hdiv6	7.900553	6	0.245480
HD80 & Hdiv6	1.892580	6	0.929308
HD81 & Hdiv6	14.850233	6	0.021454
HD90 & Hdiv6	5.564054	6	0.473749
HD42 & Hdiv7	10.678427	10	0.383114
HD43 & Hdiv7	3.822546	10	0.954997
HD47 & Hdiv7	11.779742	10	0.300068
HD59 & Hdiv7	6.673536	10	0.755864
HD65 & Hdiv7	5.348951	10	0.866683
HD70 & Hdiv7	8.209549	10	0.608377
HD77 & Hdiv7	3.515448	10	0.966571
HD80 & Hdiv7	12.223303	8	0.141515
HD81 & Hdiv7	6.189525	10	0.799097
HD90 & Hdiv7	5.956235	10	0.818927
HDiv6 & Hdiv7	5.878627	6	0.436923
HD42 & Hdiv8	7.831760	8	0.450075
HD43 & Hdiv8	9.160740	8	0.328918
HD47 & Hdiv8	8.365582	8	0.398598
HD59 & Hdiv8	8.188667	8	0.415261
HD65 & Hdiv8	16.813790	8	0.032108
HD70 & Hdiv8	9.187151	8	0.326755
HD77 & Hdiv8	16.519762	8	0.035517
HD80 & Hdiv8	6.292180	8	0.614539
HD81 & Hdiv8	9.788558	8	0.280181
HD90 & Hdiv8	5.987575	8	0.648624
HDiv6 & Hdiv8	9.670486	4	0.046360
HDiv7 & Hdiv8	13.546302	8	0.094385
HD42 & Hdiv9	4.595874	10	0.916490
HD43 & Hdiv9	7.986836	10	0.630123
HD47 & Hdiv9	1.656232	10	0.998361
HD59 & Hdiv9	7.089926	10	0.716929
HD65 & Hdiv9	7.151619	10	0.711058
HD70 & Hdiv9	8.892806	10	0.542306
HD77 & Hdiv9	7.125827	10	0.713515
HD80 & Hdiv9	7.683008	10	0.659769
HD81 & Hdiv9	2.704740	10	0.987545
HD90 & Hdiv9	14.228626	10	0.162816
Hdiv6 & Hdiv9	5.971410	6	0.426400
Hdiv7 & Hdiv9	9.490347	10	0.486284
Hdiv8 & Hdiv9	1.338870	8	0.995071
